# 1 Sustaining yam yields amidst climate threat in the forest – 2 savannah transition zone of Ghana

3  
4 Frimpong F.\*<sup>1,2</sup>, Owusu Danquah E.<sup>2</sup>, Ennin S. A.<sup>2</sup>, Asumadu H.<sup>3</sup>, Aidoo A. K.<sup>2</sup>, Maroya N.<sup>3</sup>

5  
6 <sup>1</sup>Forschungszentrum Jülich, Institute of Bio-Geosciences 2, Plant Sciences, Germany

7  
8 <sup>2</sup>Council for Scientific and Industrial Research- Crops Research Institute, P. O. Box 3785  
9 Kumasi, Ghana.

10  
11 <sup>3</sup>IITA, Ibadan, Nigeria

12  
13 \*Corresponding Author's Email: [f.frimpong@fz-juelich.de](mailto:f.frimpong@fz-juelich.de)

## 14 Abstract

15  
16 With about 70% of yam tuber been water, yield is critically affected during bulking as a result  
17 of onset of temporal drought. As a consequence of climate change, farmers who are into  
18 *Dioscorea rotundata* (white yam) production for local and international market lose their  
19 investments mainly due to erratic precipitation, drought spells culminating into low yields of  
20 just 12t/ha compared to the potential of about 22-49t/ha depending on the variety. Innovative  
21 land uses technologies with higher and sustained productivity for yam production are  
22 imperative. This study verifies improved agronomic package for sustainable yam production  
23 in yam growing areas in the forest – savannah transition zone of Ghana during the 2015 and  
24 2016 cropping seasons. The improved agronomic package included use of ridging as seedbed,  
25 seed treatment before planting, fertilizer application at a rate of 30:30:36 N:P<sub>2</sub>O<sub>5</sub>:K<sub>2</sub>O kg/ha  
26 plus 15 kg/ha Mg and 20 kg/ha S as MgSO<sub>4</sub> and the use of minimum stakes (trellis; 30-50%  
27 less number of stakes used by farmers staking). This was compared with farmers' practice  
28 which consisted of mounding, no fertilizer application and no seed treatment. The results  
29 revealed significant ( $P \leq 0.01$ ) yam yields of more than 60% difference between the improved  
30 agronomic practice and farmers' practice from Ejura, Atebubu and Kintampo yam growing  
31 communities. Adoption of improved agronomic practices does not only sustain yam  
32 production and address deforestation but also provide higher returns on investments  
33 promoting climate resilience by small holders.

## 34 Key Words

35 *Climate smart agriculture, Fertilizer, Improved technology, Seed treatment, Trellis staking,*  
36 *Yam*

## 38 Background

40 In Ghana, crops are already experiencing heat stress, drought spells, several pests and  
41 diseases outbreak and shorter growing crop duration as a consequent of the changing climate  
42 (1). Thus, a potential catastrophe for smallholder farmers and the millions of people who  
43 regularly grow rain-fed full season crops such as yam, cocoyam, rice etc.(2–5). Choices about  
44 what to grow are often dictated by the ability of the rainfall regime to support moisture for  
45 plant growth (6). One way around this would be to breed for varieties with shorter crop  
46 maturity durations or management interventions that build on the resilience of cropping  
47 production systems to reduce shocks if the shocks from the climate change cannot be done  
48 away with. Evidence suggests that climate smart agriculture can make a contribution to  
49 mitigation by supporting more efficient use of fertilizers, weed management and reduced  
50 staking options in yam production (1,7,8).

51 Yam, an important staple food crop across West Africa is a major non-traditional export  
52 crop in Ghana contributing to about 16% of the National Agricultural Gross Domestic Product  
53 (9,10). However, there are a number of challenges that hamper the production and  
54 productivity of yam. Predominantly amongst them are; inadequate rainfall, low soil fertility,  
55 weed infestation, pests and diseases in the field (foliar and soil borne) and inadequate storage  
56 facilities, attack by organisms such as rodents, access to quality improved seed, implements  
57 for mechanization etc.(8,11). Others include shortage of stakes especially from deforested  
58 areas and guinea savannah regions. This is as a consequent of clearing new lands year after  
59 year popularly known as shifting cultivation and slash and burn agriculture, inadequate labour  
60 in view of the labor intensive nature of yam cultivation (e.g. for preparation of mounds,  
61 staking, harvesting)(8,12,13). This current yam production system where there is annual  
62 shifting of farm to new lands is not sustainable and therefore the urgent need to disseminate  
63 an environmentally sound yam production technology that would increase yield and sustain  
64 production on continuously cropped fields particularly in the face of climate change (14).

65 As a follow up on an on-station evaluation conducted in 2013 and 2014 cropping seasons  
66 at the CSIR-Crops Research Institute research stations, recommended agronomic package of  
67 planting treated yam seeds on ridges with fertilizer rate of 30:30:36 N: P<sub>2</sub>O<sub>5</sub>:K<sub>2</sub>O kg/ha plus 15  
68 kg/ha Mg and 20 kg/ha S as MgSO<sub>4</sub> and trellis staking were verified by comparing it with the  
69 farmers practices on farmers' fields at Ejura, Atebubu and Kintampo yam growing  
70 communities. The use of ridges and yam seed treatment helps to maintain optimum number of  
71 stands per unit area and fertilizer addresses the soil nutrient depletion whiles the trellis staking  
72 option uses ropes and few stakes to address the challenge of scarcity of stakes and cutting of  
73 more trees/bamboo for staking. The study has a major objective of validating and  
74 demonstrating improved yam production technologies (macronutrients (NPK) and  
75 micronutrients (Mg & S), minimum staking option and seed treatment) to major yam growing  
76 communities in Ghana.

## 77 **Methodology**

### 78 **Study sites characteristics**

79 The experiments were conducted in 2015 and 2016 cropping seasons at Ejura-Sekyere  
80 dumasi (Aframso/Teacherkrom, Ashakoko, Dromankuma & Nkwanta), Atebubu- Amantin  
81 (Adom, Dagaati Line, Munchunso & Nwowamu) and Kintampo North (Asantekwa, Suamre,  
82 Babaso/Yabraso & Kintampo Magazine) districts of Ghana (Fig 1). These areas lies in the  
83 forest-savannah transition agro-ecological zone and amongst the major yam growing areas of  
84 Ghana (15). Eight farmers (4 randomly selected for analysis) from each of the three  
85 operational areas were selected for the study every season (Table 1). Mean annual rainfall  
86 (mm) for 2015 & 2016 across locations are shown in the map (Fig 1). The data were sourced  
87 from the local district weather stations which revealed a reduced rainfall amount (mm) in  
88 2016 compared to 2015 with Kintampo communities severely affected (Fig 1). Mean annual  
89 rainfall (mm) pairs recorded for 2015 and 2016 were 1256:1034, 929:769, and 863:795 at

90 Ejura, Atebubu and Kintampo respectively (Fig 1). These locations have bimodal rainfall i.e.  
 91 major rainy season from March-Mid August and minor rainy season from September-  
 92 November; peak in October. Temperature ranges from 25-39 °C with soil type of Ferric  
 93 Acrisol; Asuansi series, upper top soil consist of 5cm grayish brown sandy loam topsoil of  
 94 dark brown gritty clay loam (16).

95  
 96 **Figure 1. Map of Ghana on the (right), zoomed in on Ejura-Sekyeredumasi, Atebubu –**  
 97 **Amantin and Kintampo North districts (left) of the forest-savanna transition zone.**  
 98 Farming communities where the studies were undertaken for 2015 and 2016 cropping seasons  
 99 are illustrated with dots (.) with their names beside. Mean annual rainfall (mm) per location  
 100 are depicted by bar plots for each season.

101  
 102 **Table 1. Farmers and planting dates selected from each of the operational areas for the**  
 103 **analysis in 2015 and 2016.**

| Year | Atebubu                                     |       | Ejura    |        | Kintampo |        |
|------|---------------------------------------------|-------|----------|--------|----------|--------|
|      | Farmers and their respective planting dates |       |          |        |          |        |
| 2015 | Farmer A                                    | 2-Jun | Farmer A | 11-Jun | Farmer A | 21-Jun |
|      | Farmer B                                    | 5-Jun | Farmer B | 11-Jun | Farmer B | 21-Jun |
|      | Farmer C                                    | 6-Jun | Farmer C | 11-Jun | Farmer C | 21-Jun |
|      | Farmer D                                    | 4-Jun | Farmer D | 12-Jun | Farmer D | 21-Jun |
| 2016 | Farmer E                                    | 4-Jun | Farmer E | 1-Jun  | Farmer E | 9-Jun  |
|      | Farmer F                                    | 5-Jun | Farmer F | 2-Jun  | Farmer F | 10-Jun |
|      | Farmer G                                    | 5-Jun | Farmer G | 3-Jun  | Farmer G | 10-Jun |
|      | Farmer H                                    | 6-Jun | Farmer H | 2-Jun  | Farmer H | 11-Jun |

## 113 Experimental design

114 A randomized complete block design with each farmer as a replicate was used for the study. A  
 115 total of 8 trials (8 replicates) were established in all the operational areas in 2015 and 2016.  
 116 Local white yam variety “Dente” of *Dioscorea rotundata* species was planted and subjected  
 117 to two treatment applications from start of planting till harvest. Planting of yam across these  
 118 locations were started in June and completed by 21-June of each year (Table 1). Harvesting

119 of yam was completed by the end of December of each year. The treatments were  
120 recommended (improved agronomic practice) and local technology/farmers' practice. The  
121 recommended practice for yam production included a package of; treating yam seed before  
122 planting with fungicide and insecticide, use of ridging as seedbed, fertilization at 30:30:36 N:  
123 P<sub>2</sub>O<sub>5</sub>:K<sub>2</sub>O Kg/ha plus 15Kg/ha of Mg and 20Kg/ha S as MgSO<sub>4</sub> and use of trellis for staking  
124 whiles in the farmers' practice, farmers were allowed to use their local technology (planting  
125 on mounds), no pre-treatment of seed, no fertilizer application for comparison. Continuously  
126 cropped fields that farmers would normally not use for yam production were selected in each  
127 operational area for the study. Each improved agronomic field had an area of a quarter of an  
128 acre (0.25ac/0.1ha) planted at 1.2m inter row and 0.8m on the ridges (10,416 stands/ha).

129 The same size (0.25ac/0.1ha) was demarcated for the farmers practice treatment where they  
130 mounded sparsely to cover the entire field (3,400 – 4,000 stands/ha). Each farmer field was  
131 considered as a replicate and analysis compiled for each district/operational area together. The  
132 Fertilizer treatment was applied at 50% split at 5-6 weeks and 11-12 weeks after planting in  
133 all the locations. The seed setts (200-250g) of the improved agronomic fields were treated  
134 with Dursban (Chlorpyrifos from Dow Agro Sciences; 1.25 l/ha) and Mancozeb  
135 (Dithiocarbamate from Ag-Chem Africa 80%; 75 g in 15 l of water) before planting. Farmers'  
136 sett sizes used ranged between 350g to 650g depending on each farmer. Emerged weeds in the  
137 improved agronomic fields were controlled with glyphosate (2.5 liter per ha) before the  
138 sprouting of the yam while farmers only slashed on their fields. There after weeds were  
139 manually controlled with cutlass and hoe in either improved agronomic field or farmers' field  
140 by hoeing. In 2016, sensory evaluations were conducted with 50 participants (who were  
141 mainly farmers from the localities) in all areas after eating boiled yam during the December  
142 harvest. Fertilized and unfertilized boiled yam (coded at the blind side of the participants)  
143 using one on one questionnaire interviews, farmers scored for taste, texture, aroma and  
144 acceptability (Table 3).

## 145 **Data collection and analysis**

146 During harvest, the tubers were grouped into two; ware yam (tuber sizes of more than 500g)  
147 and seed yam (500g and below) and weighed separately for each of the practices. Four  
148 replications from each operational area (Ejura, Atebubu and Kintampo) and across the two  
149 seasons (2015, 2016) were subjected to statistical analysis. Data on stand harvested, weight of  
150 ware yam, weight of seed yam and total yam yield collected were subjected to one way  
151 analysis of variance linear model at 5% significant level using 'R' statistical software with the  
152 practice treatment as the independent variable. Where treatment means differ, Tukey's HSD  
153 test was used to group them and visualized with bar graphs using MS excel 2010. Percentage  
154 differences of total yam yield harvested between the improved practice and the farmer's was  
155 calculated based on the formula;

$$156 \text{ Percentage difference} = \frac{(\text{improved agronomic practice} - \text{farmers' practice})}{(\text{improved agronomic practice} + \text{farmers' practice}/2)} \times 100$$

157 Sensory evaluation through one on one interviews upon tasting boiled yam from fertilized and  
158 unfertilized samples were calculated with data from 50 participants for each location who  
159 were mainly farmers. In order to deduce return on investment after venturing in any of the  
160 practices was subsequently calculated using benefit cost ratio for each of the locations using  
161 total yam yield and price per kg of yam at the time of harvest.

## 162 **Results and Discussion**

### 163 **Influence of improved agronomic technology on yam tuber yield**

164 Generally, total yam tuber yields were high in 2015 than in 2016 cropping season irrespective  
165 of the practice (Figs 2-4). The improved agronomic practice fields had significantly ( $P < 0.01$ )  
166 higher total tuber yields compared to the farmers' practice fields across the locations despite  
167 the season (Figs 2-4). Availability of moisture is critical for yam to sprout and establish  
168 during early growth stages and vital to bulk bigger tubers(11,17–20). Higher rainfall during  
169 2015 cropping season (Fig 1) might have ensured yam establishment and increased overall

170 yields compared to 2016. The use of improved agronomic package of ridging, yam seed pre-  
171 treatment, trellis staking and fertilizer rate of 30:30:36 N: P<sub>2</sub>O<sub>5</sub>:K<sub>2</sub>O kg/ha plus 15 kg/ha Mg  
172 and 20 kg/ha S as MgSO<sub>4</sub> resulted in total tuber yield percentage difference over farmers'  
173 practice of mounding and planting of 68.6%, 78.3%, 80.7% for the 2015 cropping season and  
174 113.6%, 113.9%, 120% for 2016 cropping season in Ejura, Atebubu and Kintampo farming  
175 communities (Fig 5) respectively. Stand count/ha on the ridges were significantly (P<0.01)  
176 higher on the improved agronomic practice fields than farmers' practice fields for all the  
177 locations and across season (Figs 2-4). This we attribute to the use of ridges which made it  
178 possible to plant at 1.2m between ridges and 0.8m on the ridges resulting in a planting density  
179 of about 10,416 stands per hectare while the farmers practice of mounding were relatively  
180 sparse (1.5m-2m) resulting in just about 3,400 – 4,000 stands/ha. Thus, ridging helped  
181 maintain optimum number of plants and promoted efficient use of fertilizer and conserved  
182 moisture than mounding.

183 It was observed that the improved agronomic fields had better yam canopy as a result of the  
184 combined effect of trellis staking and ridging. Revealing similar tuber yield trends on  
185 fertilized mounds and unfertilized ridges (8) supports the argument that fertilizer application  
186 helps the farmer to achieve value by being more efficient and profitable on ridges than on  
187 mounds. Moreover, pre-treating seed yam before planting on the improved agronomic fields  
188 resulted in a reduction in yam rot and increased stands/ha than on the farmers' practice fields  
189 where seeds were not treated resulting in lower stands/ha. Seed treatment for pest and disease  
190 before planting is recommended to promote sprout rate ensuring improvement in final stand  
191 density culminating into overall high yam yields (11,12,17). Erratic rainfall and prolonged  
192 drought require technologies that enable the soil to conserve moisture and promote nutrient  
193 use efficiency in order to increase resiliency of any cropping system. An observation we made  
194 during the studies was that drought was more pronounced on the farmers' practice which used  
195 relatively sparse mounds and vertical staking option than on the improved agronomic

196 practices which used ridges and trellis staking option. Similar studies suggest that planting on  
197 ridges can maintain optimum plant stands and conserve more moisture than mounds resulting  
198 in more efficient water used on ridges than on mounds (7,8,17,21). These attributes makes the  
199 use of ridges more soil nutrient efficient upon application of fertilizer than on mounds.  
200 Furthermore, (8) made a similar observation with planting on ridges increasing yields  
201 significantly than on mounds.

202 It is recommended that adopting and following through the improved agronomic package  
203 based on results of 2016 cropping season (Figs 1-5) where rainfall were considerably lower  
204 illustrates the resilience ability of it during reduced precipitation. In spite of the gains in yam  
205 fertilization, there are perceptions and claims by some consumers and farmers in the public  
206 space that fertilizing yam leads to rots and reduces the overall shelf life. We recommend  
207 further research into these claims as we settled the dust in this paper (Table 3) on claims that  
208 fertilizer affected the taste quality of yam.

209  
210 **Figure 2. Yam tuber yields and stand count as influenced by improved agronomic**  
211 **practice and farmers' practice in the Ejura farming communities for 2015 and 2016**  
212 **cropping seasons.** Mean values and standard errors (n = 4) are plotted. Index letters above the  
213 bars indicate significant differences (P < 0.01) between media not sharing the same letter by  
214 Tukey's HSD test. Asterisks indicate significant differences (P < 0.01) between the two  
215 practices.

216  
217 **Figure 3. Yam tuber yields and stand count as influenced by improved agronomic**  
218 **practice and farmers' practice in the Atebubu farming communities for 2015 and 2016**  
219 **cropping seasons.** Mean values and standard errors (n = 4) are plotted. Index letters above the  
220 bars indicate significant differences (P < 0.01) between media not sharing the same letter by  
221 Tukey's HSD test. Asterisks indicate significant differences (P < 0.01) between the two  
222 practices.

223



224 **Figure 4. Yam tuber yields and stand count as influenced by improved agronomic**  
225 **practice and farmers' practice in the Kintampo farming communities for 2015 and 2016**  
226 **cropping seasons.** Mean values and standard errors (n = 4) are plotted. Index letters above the  
227 bars indicate significant differences (P < 0.01) between media not sharing the same letter by  
228 Tukey's HSD test. Asterisks indicate significant differences (P < 0.01) between the two  
229 practices.

231  
232 **Figure 5. Percentage differences between the two practices across two seasons calculated**  
233 **for each location based on their total yam yield (kg/ha).**

### 235 **Partial budgeting and cost benefit analysis of the two practices**

236 **Table 2** presents the partial budgeting and cost benefit analysis of “*Dente*” white yam  
237 production under improved agronomic practice and farmers' practice in Ejura, Atebubu and  
238 Kintampo operational areas. The results revealed that irrespective of location or the season,  
239 yam planted with the improved agronomic package had higher benefit to cost ratio compared  
240 to farmers' practice. Benefit to cost ratios of 4.76:3.64, 4.04:2.48 and 2.01:1.08 were achieved  
241 for Ejura, Atebubu and Kintampo communities respectively for the 2015 cropping season  
242 (**Table 2**) in sequence of improved technology: farmers' practice. Thus, when a farmer invests  
243 GhC 1.00 in yam production using the recommended improved technology a profit of GhC  
244 3.76, GhC 3.04 and GhC 1.01 was to be accrued in addition to the GhC 1.00 invested capital  
245 at Ejura, Atebubu and Kintampo respectively during the 2015 season. During the 2016  
246 cropping season, drought was more intense particularly for Atebubu and Kintampo areas  
247 (Figure 1). This however did not affect benefit to cost ratio for using the improved agronomic  
248 package thus achieving 3.76, 3.03 and 1.33 compared to 1.16, 0.75 and -0.55 for Ejura,  
249 Atebubu and Kintampo communities respectively (**Table 2**). Thus, a profit of GhC 2.76, GhC  
250 2.03 and GhC 0.33 was to be accrued in addition to the GhC 1.00 invested capital upon the  
251 use of improved agronomic practices at Ejura, Atebubu and Kintampo respectively. The use  
252 of the farmers' practice resulted in total loss of GhC 1.55 in Kintampo area (**Table 2**). This  
253 suggest that the use of the improved agronomic practice would not only increase and sustain

254 yields on continuously cropped fields but also the it is the best option during drought spells,  
 255 erratic and reduced rainfall conditions. The improved agronomic package thereby increases  
 256 farmer's resilience in dealing with such harsh weather conditions with assured returns on their  
 257 investments.

258 **Table 2. Partial budget and cost benefit analysis of white yam production with improved**  
 259 **technology and farmers practices at Ejura, Atebubu and Kintampo farming**  
 260 **communities for the 2015 and 2016 cropping seasons.**

| Location<br>Practice                                              | Ejura operational area                            |                                      |                                                   |                                      | Atebubu operational area                           |                                      |                                                    |                                      | Kintampo operational area                          |                                      |                                                    |                              |
|-------------------------------------------------------------------|---------------------------------------------------|--------------------------------------|---------------------------------------------------|--------------------------------------|----------------------------------------------------|--------------------------------------|----------------------------------------------------|--------------------------------------|----------------------------------------------------|--------------------------------------|----------------------------------------------------|------------------------------|
|                                                                   | Improve<br>d<br>agro<br>nom<br>ic<br>prac<br>tice | Far<br>mer<br>s'<br>pra<br>ctic<br>e | Improve<br>d<br>agro<br>nom<br>ic<br>prac<br>tice | Far<br>mer<br>s'<br>pra<br>ctic<br>e | Improve<br>d<br>agro<br>nom<br>ic<br>prac<br>tices | Far<br>mer<br>s'<br>pra<br>ctic<br>e | Improve<br>d<br>agro<br>nom<br>ic<br>prac<br>tices | Far<br>mer<br>s'<br>pra<br>ctic<br>e | Improve<br>d<br>agro<br>nom<br>ic<br>prac<br>tices | Far<br>mer<br>s'<br>pra<br>ctic<br>e | Improve<br>d<br>agro<br>nom<br>ic<br>prac<br>tices | Farme<br>rs'<br>practi<br>ce |
| Year                                                              | 2015                                              | 2015                                 | 2016                                              | 2016                                 | 2015                                               | 2015                                 | 2016                                               | 2016                                 | 2015                                               | 2015                                 | 2016                                               | 2016                         |
| Average yield (kg/ha)                                             | 1780                                              | 870                                  | 1420                                              | 391                                  | 1670                                               | 730                                  | 1240                                               | 340                                  | 1060                                               | 450                                  | 8200                                               | 2050                         |
| Adjusted yield (kg/ha)                                            | 1602                                              | 783                                  | 1278                                              | 351                                  | 1503                                               | 657                                  | 1116                                               | 306                                  | 9540                                               | 405                                  | 7380                                               | 1845                         |
| Farm gate price in December each year (C/kg)                      | 1.4                                               | 1.4                                  | 1.45                                              | 1.4                                  | 1.3                                                | 1.3                                  | 1.4                                                | 1.4                                  | 1.2                                                | 1.2                                  | 1.2                                                | 1.2                          |
| Gross benefit(C/ha)                                               | 2242                                              | 109                                  | 1853                                              | 510                                  | 1953                                               | 854                                  | 1562                                               | 428                                  | 1144                                               | 486                                  | 8856                                               | 2214                         |
| Cost of chemical fertilizer, glyphosate, fungicide & pesticide(C) | 355                                               | 0                                    | 355                                               | 0                                    | 355                                                | 0                                    | 355                                                | 0                                    | 355                                                | 0                                    | 355                                                | 0                            |
| Labour cost for application of fertilizer & others (C/ha)         | 153                                               | 0                                    | 153                                               | 0                                    | 153                                                | 0                                    | 153                                                | 0                                    | 153                                                | 0                                    | 153                                                | 0                            |
| Cost of land clearing and stumping (C/ha)                         | 320                                               | 0                                    | 320                                               | 0                                    | 290                                                | 0                                    | 290                                                | 0                                    | 300                                                | 0                                    | 300                                                | 0                            |
| Construction of ridges (C/ha)                                     | 300                                               | 0                                    | 300                                               | 0                                    | 300                                                | 0                                    | 300                                                | 0                                    | 300                                                | 0                                    | 300                                                | 0                            |
| Construction of mounds (C/ha)                                     | 0                                                 | 200                                  | 0                                                 | 200                                  | 0                                                  | 250                                  | 0                                                  | 250                                  | 0                                                  | 240                                  | 0                                                  | 240                          |
| Cost of seed yam(C)                                               | 955                                               | 455                                  | 955                                               | 455                                  | 955                                                | 455                                  | 955                                                | 455                                  | 955                                                | 455                                  | 955                                                | 455                          |
| Labour cost of planting(C/ha)                                     | 161                                               | 139                                  | 161                                               | 139                                  | 160                                                | 140                                  | 160                                                | 140                                  | 160                                                | 140                                  | 160                                                | 140                          |
| Cost of stakes(C/ha)                                              | 392                                               | 282                                  | 392                                               | 282                                  | 392                                                | 282                                  | 392                                                | 282                                  | 392                                                | 282                                  | 392                                                | 282                          |
| Labour cost of staking(C/ha)                                      | 400                                               | 460                                  | 400                                               | 460                                  | 415                                                | 500                                  | 415                                                | 500                                  | 405                                                | 470                                  | 405                                                | 470                          |

|                                     |             |             |             |             |             |             |             |             |             |             |             |              |
|-------------------------------------|-------------|-------------|-------------|-------------|-------------|-------------|-------------|-------------|-------------|-------------|-------------|--------------|
| Cost of weeding and reshaping(C/ha) | 675         | 675         | 675         | 675         | 675         | 675         | 675         | 675         | 600         | 600         | 600         | 600          |
| Harvesting cost(C/ha)               | 182         | 153         | 182         | 153         | 182         | 153         | 182         | 153         | 182         | 153         | 182         | 153          |
| Total cost that vary (C)            | 3893        | 2364        | 3893        | 2364        | 3877        | 2455        | 3877        | 2455        | 3802        | 2340        | 3802        | 2340         |
| Net benefit (C)                     | 18535       | 8598        | 14638       | 2738.55     | 15662       | 6086        | 11747       | 1829        | 7646        | 2520        | 5054        | -126         |
| <b>Benefit cost/Ratio</b>           | <b>4.76</b> | <b>3.64</b> | <b>3.76</b> | <b>1.16</b> | <b>4.04</b> | <b>2.48</b> | <b>3.03</b> | <b>0.75</b> | <b>2.01</b> | <b>1.08</b> | <b>1.33</b> | <b>-0.05</b> |

261

## 262 **Influence of fertilizer on the taste of boiled yam**

263 Dente yam planted in 2016 under the improved agronomic practice (fertilized) and farmers’  
 264 practice (unfertilized) were boiled after harvest and given to fifty participants each from  
 265 Atebubu, Ejura and Kintampo who were mainly farmers for sensory evaluation (Table 3).  
 266 Participants were not previewed as to whether the yam they evaluated at a given time was  
 267 fertilized or unfertilized as they were coded in order to avoid bias. Participants assessed the  
 268 various boiled yam on three culinary qualities: ‘taste’, ‘texture’ and ‘aroma’ (Table 3) based  
 269 on their individual preferences from a scale of 1 up to 5 with 1 been the best score and 5 as  
 270 the worst. Overall acceptability and STD acceptability on the three traits; taste, texture and  
 271 aroma was subsequently calculated following the approach of (8). The results was in line with  
 272 previous results by (8) that, contrary to the view that the use of fertilizer in yam production  
 273 affects the quality of yam, sensory evaluation showed that the culinary qualities of fertilized  
 274 yam is good and could even be better than unfertilized yam.

275

276

277

278

279

280 **Table 3. Sensory evaluation of fertilized and unfertilized boiled yam involving farmers**  
 281 **from Atebubu, Ejura and Kintampo farming communities.**

| Location | Treatment                                                                                                                       | Taste | Texture | Aroma | Overall acceptability | STD acceptability |
|----------|---------------------------------------------------------------------------------------------------------------------------------|-------|---------|-------|-----------------------|-------------------|
| Atebubu  | Fertilized yam (30 30 36 N-P <sub>2</sub> O <sub>5</sub> -K <sub>2</sub> O (Kg/ha) + 20kg S & 15kg 15 Mg as MgSO <sub>4</sub> ) | 2.30  | 2.5     | 2     | 2.20                  | 0.87              |
|          | Unfertilized yam (0kg/ha)                                                                                                       | 2.60  | 2.5     | 2.4   | 2.50                  | 0.86              |
| Ejura    | Fertilized yam (30 30 36 N-P <sub>2</sub> O <sub>5</sub> -K <sub>2</sub> O (Kg/ha) + 20kg S & 15kg 15 Mg as MgSO <sub>4</sub> ) | 2.90  | 2.9     | 2.8   | 2.80                  | 0.91              |
|          | Unfertilized yam (0kg/ha)                                                                                                       | 2.90  | 2.9     | 2.8   | 2.80                  | 0.91              |
| Kintampo | Fertilized yam (30 30 36 N-P <sub>2</sub> O <sub>5</sub> -K <sub>2</sub> O (Kg/ha) + 20kg S & 15kg 15 Mg as MgSO <sub>4</sub> ) | 2.10  | 2.2     | 2.4   | 2.20                  | 0.81              |
|          | Unfertilized yam (0kg/ha)                                                                                                       | 2.70  | 3.3     | 3.1   | 3.10                  | 0.97              |

282 *n=50, Score Scale 1-5; 1=best, 5=worst*

283

## 284 **Conclusion and Policy Implication**

285

286 The improved agronomic technology has proven to be climate resilient comparing the overall  
 287 yield (significantly >60% difference) trends of 2015 and 2016 seasons against farmers'  
 288 practice given the rainfall amounts and pattern in those years. The overarching difference  
 289 between what farmers do today and the improved agronomic model is the intensification drive  
 290 and a higher use efficiency (staking, nutrient, soil moisture conservation, improved sprouting)  
 291 of the technology at a given area as a consequence of the high planting density allowed by the  
 292 linear arrangement of ridging, trellis staking and seed treatment. It is anticipated that more and

293 more farmers who have shown keen interest would adopt the technology through the gains  
294 made. Claims on yam fertilization affecting taste quality proved otherwise with even a higher  
295 overall acceptability. Further research is needed to understand claims and perceptions by  
296 farmers on fertilizer affecting yam storage. Up-scaling of the improved agronomic technology  
297 to other yam growing communities would further augment the gains already made.

## 298 **Acknowledgement**

299 We thank the Bill and Melinda Gates Foundation who funded this research work through  
300 YIIFSWA project that was coordinated by IITA, Nigeria through CSIR-Crops Research  
301 Institute. We are grateful to Mr. Henry Azotibah (Ejura), Mr. Kyeremeh (Atebubu) all of  
302 MoFA and Mr. Enoch Bessah of CSIR for their invaluable support and advice during data  
303 acquisition and analysis.

## 304 **Abbreviations**

305

306 CSIR – Council for Scientific and Industrial Research

307 FAO – Food and Agriculture Organisation

308 IITA –International Institute for Tropical Agriculture

309 MoFA – Ministry of Food and Agriculture

310 YIIFSWA – Yam Improvement for Income and Food Security in West Africa

311

312

313

314

## 315 **References**

316

- 317 1. Essegbey GO, Nutsukpo D, Karbo N, Zougmore R. National Climate-Smart  
318 Agriculture and Food Security Action Plan of Ghana (2016-2020) [Internet].  
319 Copenhagen, Denmark; 2015. Report No.: 139. Available from: [www.ccafs.cgiar.org](http://www.ccafs.cgiar.org)
- 320 2. Maliki R, Toukourou M, Sinsin B, Vernier P. Productivity of yam-based systems with  
321 herbaceous legumes and short fallows in the Guinea-Sudan transition zone of Benin.  
322 *Nutr Cycl Agroecosystems*. 2011;92(1):9–19.
- 323 3. Mignouna BD, Abdoulaye T, Alene AD, Asiedu R, Manyong VM. Characterization of  
324 Yam-growing Households in the Project Areas of Ghana. Nigeria; 2014.
- 325 4. Srivastava AK, Gaiser T, Cornet D, Ewert F. Estimation of effective fallow availability  
326 for the prediction of yam productivity at the regional scale using model-based multiple  
327 scenario analysis. *F Crop Res*. 2012;131(November):32–9.
- 328 5. Amekudzi L, Yamba E, Preko K, Asare E, Aryee J, Baidu M, et al. Variabilities in  
329 Rainfall Onset, Cessation and Length of Rainy Season for the Various Agro-Ecological  
330 Zones of Ghana. *Climate* [Internet]. 2015;3(2):416–34. Available from:  
331 <http://www.mdpi.com/2225-1154/3/2/416/>
- 332 6. Oteng-Darko P, Frimpong F, Sarpong F, Amenorfe LP. Promoting smallholder  
333 irrigation for food Security-A review. *African J Food Integr Agric* [Internet]. 2018;2:1–  
334 7. Available from: [www.asofost.org/journals/index.php/ajfia](http://www.asofost.org/journals/index.php/ajfia)
- 335 7. Owusu Danquah E, Ennin SA, Lamptey JNL, Acheampong PP. Staking Options for  
336 Sustainable Yam Production in Ghana. *Sustain Agric Res* [Internet]. 2015;4(1):106–13.  
337 Available from: <http://dx.doi.org/10.5539/sar.v4n1p106>
- 338 8. Ennin SA, Issaka RN, Acheampong PP, Numafo M, Owusu Danquah E. Mechanization  
339 , fertilization and staking options for environmentally sound yam production. *African J*  
340 *Agric Res*. 2014;9(29):2222–30.
- 341 9. FAO. *The State of Food and Agriculture*. Rome, Italy; 2006. (37).
- 342 10. Ghana Standard Board. *Roots and Tubers –Specification for fresh yams*. Accra, Ghana;  
343 2011. (2nd Edition). Report No.: GS 150.
- 344 11. Bhattacharjee R, Gedil M, Sartie A, Otoo E, Dumet D, Kikuno H, et al. *Dioscorea*. In:  
345 *Wild Crop Relatives: Genomic and Breeding Resources. Industrial Crops*. C. Kole.  
346 Springer-Verlag Berlin Heidelberg; 2011. p. 71–96.
- 347 12. Asiedu R, Sart A. *Crops that feed the World 1. Yams: Yams for income and food*  
348 *security*. *Food Secur Springer*. 2010;2:305–15.

- 349 13. Akwaag, A. A., Berchie, J. N., Echavez, M. L., Dapaah, H. K., Kebede, T., Njue, S.  
350 W., Paraoam, I., and Labrada HR. Sustainable Farming Practices- Towards Reducing  
351 the Expansion of the Forest Savanna Transitional Zone of the Sekyere-West and Ejura-  
352 Sekyeredumase Districts of the Ashanti Region of Ghana. International Center for  
353 Development Oriented Research in Agricultu. 2000. (86).
- 354 14. Otoo E. Yam production in Ghana: A food security enhancer or an environmental  
355 degrader. In: Akoroda M, editor. 8th Symposium of the International Society for  
356 Tropical Root Crops Africa Branch Triennial Workshop. Ibadan, Nigeria; 2001. p.  
357 387–91.
- 358 15. Ministry of Food and Agriculture. Agriculture in Ghana, Facts and figures (2010)  
359 [Internet]. Accra, Ghana; 2010. Available from: [http://mofa.gov.gh/site/wp-](http://mofa.gov.gh/site/wp-content/uploads/2011/10/AGRICULTURE-IN-GHANA-FF-2010.pdf)  
360 [content/uploads/2011/10/AGRICULTURE-IN-GHANA-FF-2010.pdf](http://mofa.gov.gh/site/wp-content/uploads/2011/10/AGRICULTURE-IN-GHANA-FF-2010.pdf)
- 361 16. Adu S. V. and Asiamah R. D. Soils of the Ayensu-Densu Basin, Central, Eastern and  
362 Greater Accra Regions of Ghana. Council for Scientific and Industrial Research (CSIR)  
363 – Soil Research Institute Memoir, Kumasi, Ghana; 1992. Report No.: 9.
- 364 17. Ennin S. A., Owusu Danquah E., Frimpong F., Akom M., Osei-Adu J., Lamptey J. N.  
365 L., Oteng-Darko P., Osei K., Osuman A. S., Aidoo A. K., Adama I., Appiah-Danquah  
366 P. HJ. Yam Production and Marketing Guide. H. Adu-Dapaah, J. N. L. Lamptey, I. S.  
367 Baning, B. N. Frimpong JOA and SAE, editor. Kumasi, Ghana: CSIR-Crops Research  
368 Institute; 2016.
- 369 18. Maroya NG, Balogun M, Asiedu R, Aighewi B, Lava Kumar P, Joao A. Yam  
370 Propagation Using ‘ Aeroponics ’ Technology. Annu Res Rev Biol. 2014;4(24):3894–  
371 903.
- 372 19. Maroya NG, Asiedu R, Kumar PL, Lopez-Montes A, Orchard J, Ndiame F. YIIFSWA  
373 Project Description [Internet]. Ibadan, Nigeria; 2014. (YIIFSWA Working Paper).  
374 Report No.: 1. Available from: [www.iita.org](http://www.iita.org)
- 375 20. Maroya NG, Balogun M, Asiedu R. Seed yam Production in an Aeroponics System: A  
376 Novel Technology [Internet]. Ibadan, Nigeria; 2014. (YIIFSWA Working Paper  
377 Series). Report No.: 2. Available from: [www.iita.org](http://www.iita.org)
- 378 21. Ennin SA, Otoo E, Tetteh FM. Ridging, a mechanized alternative to mounding for yam  
379 and cassava production. West African J Appl Ecol. 2009;15(1).  
380

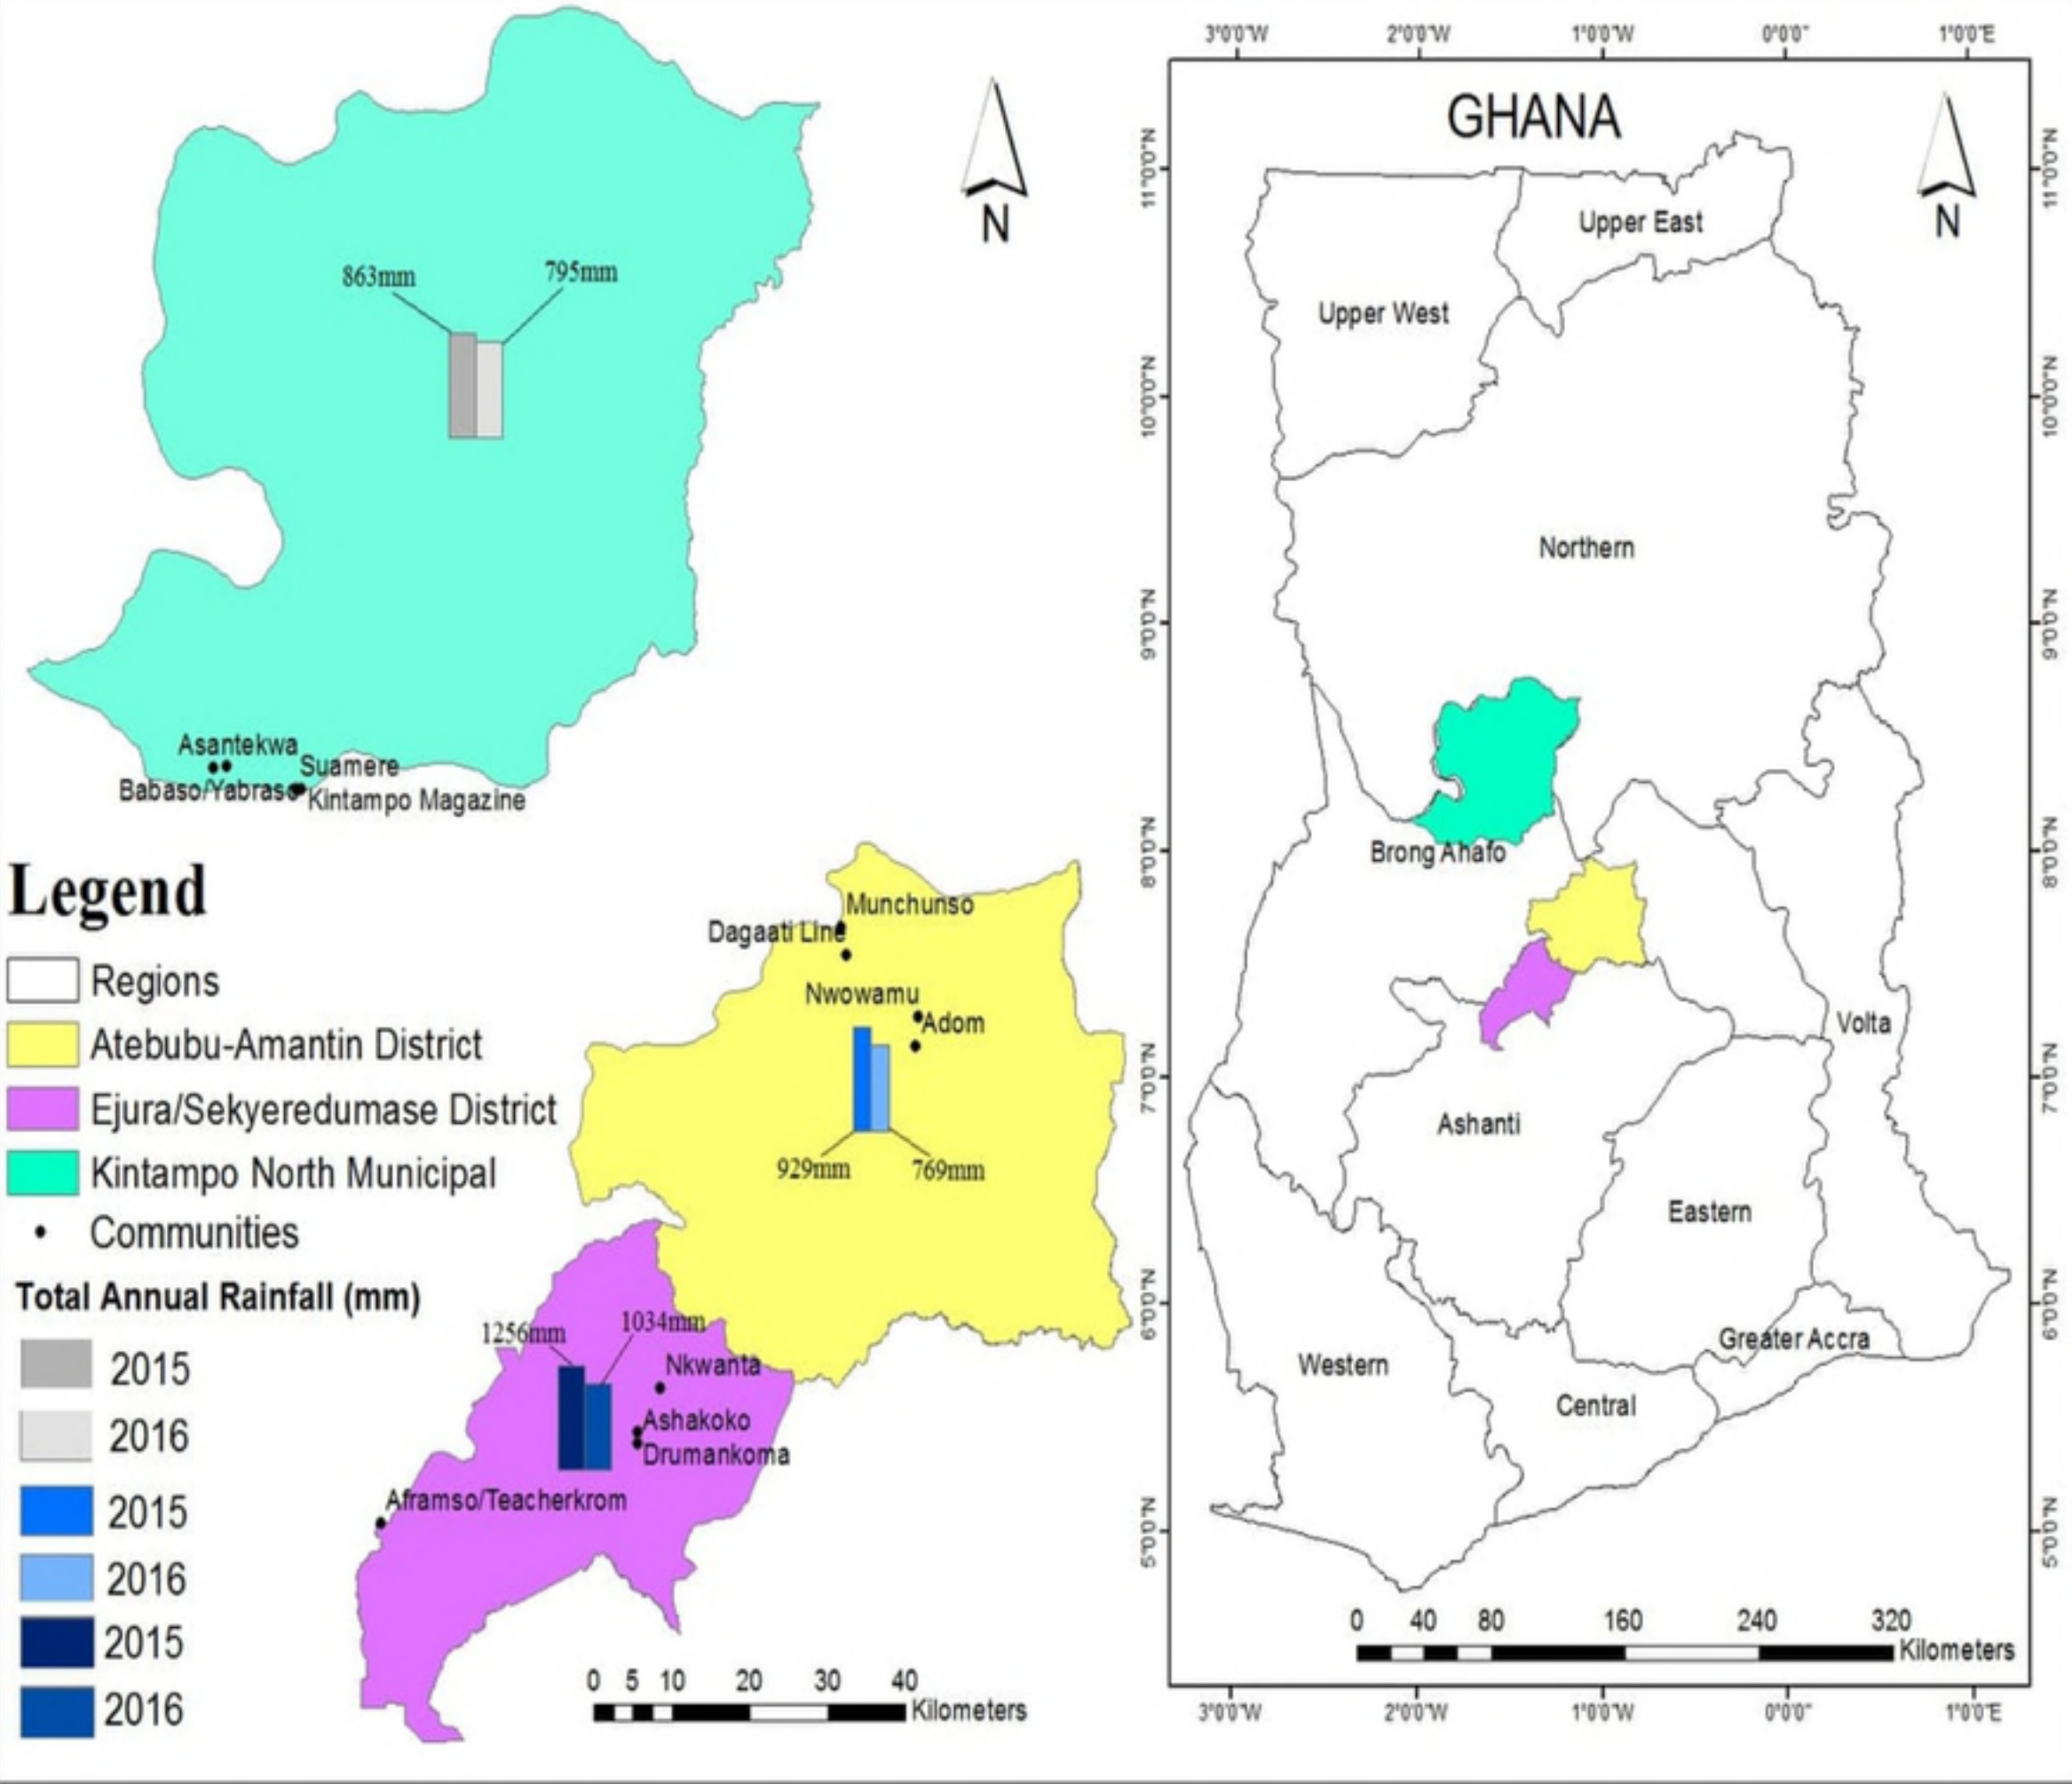

Figure 1



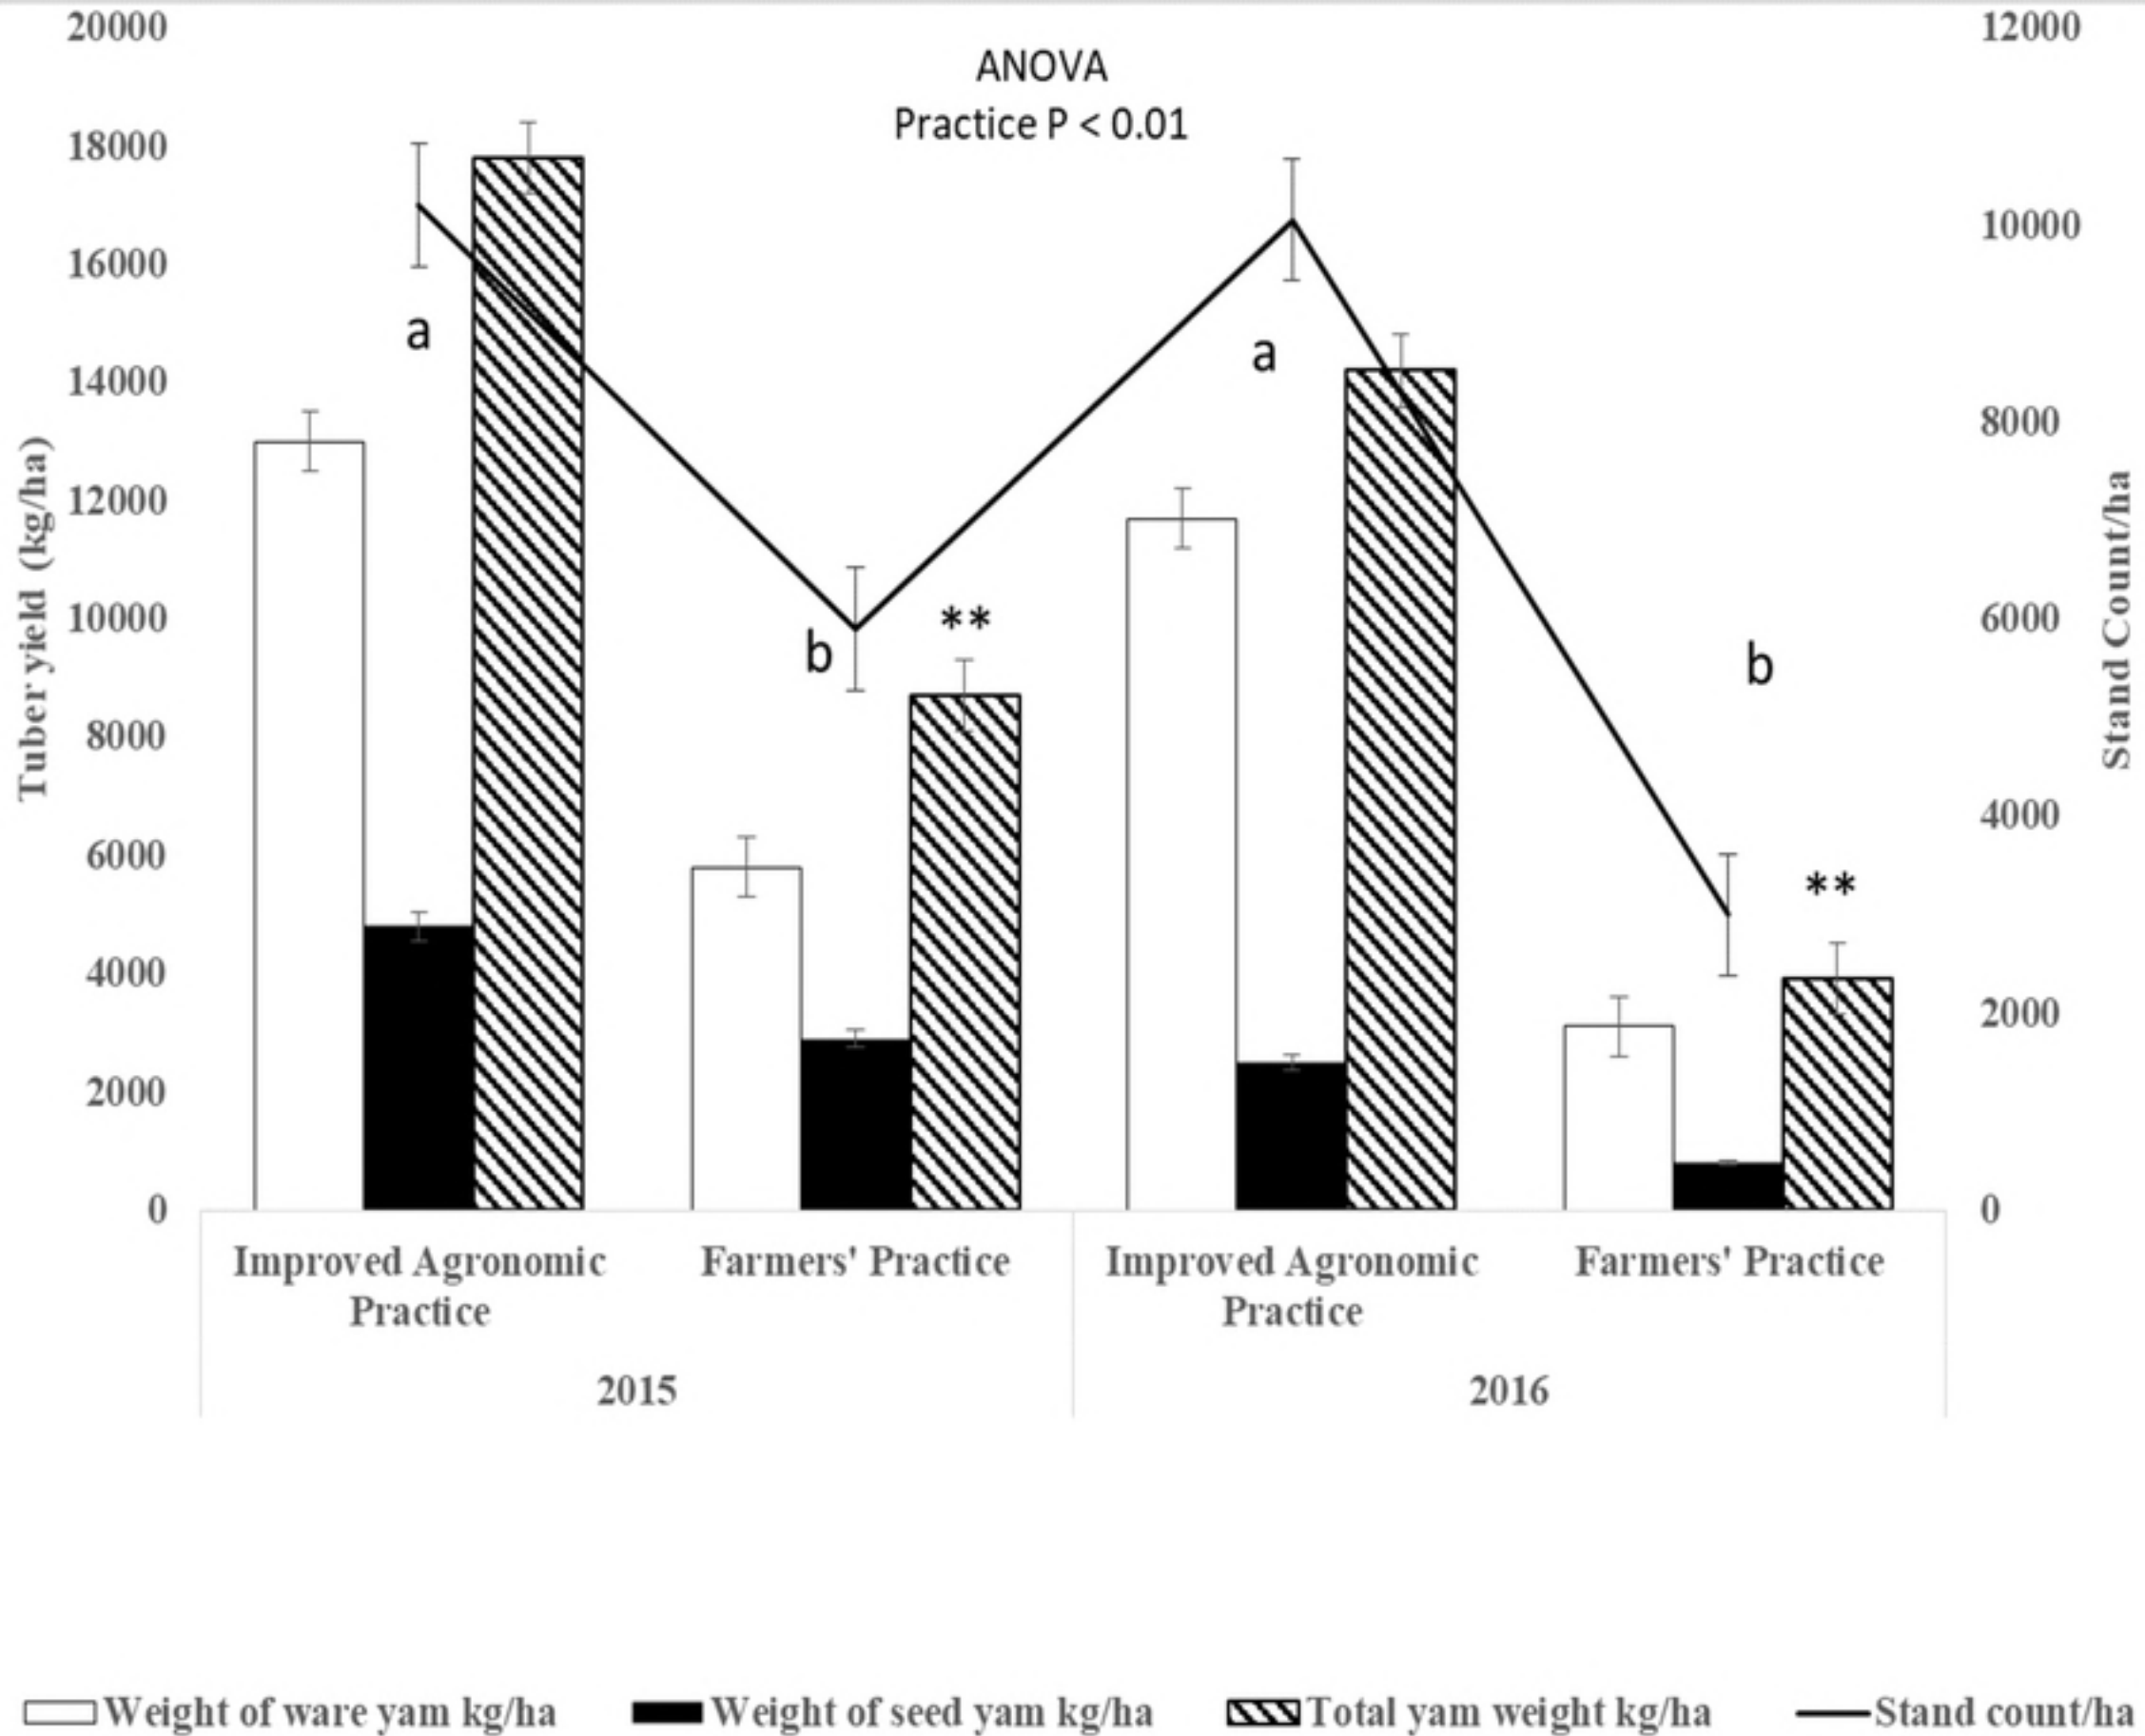

Figure 2

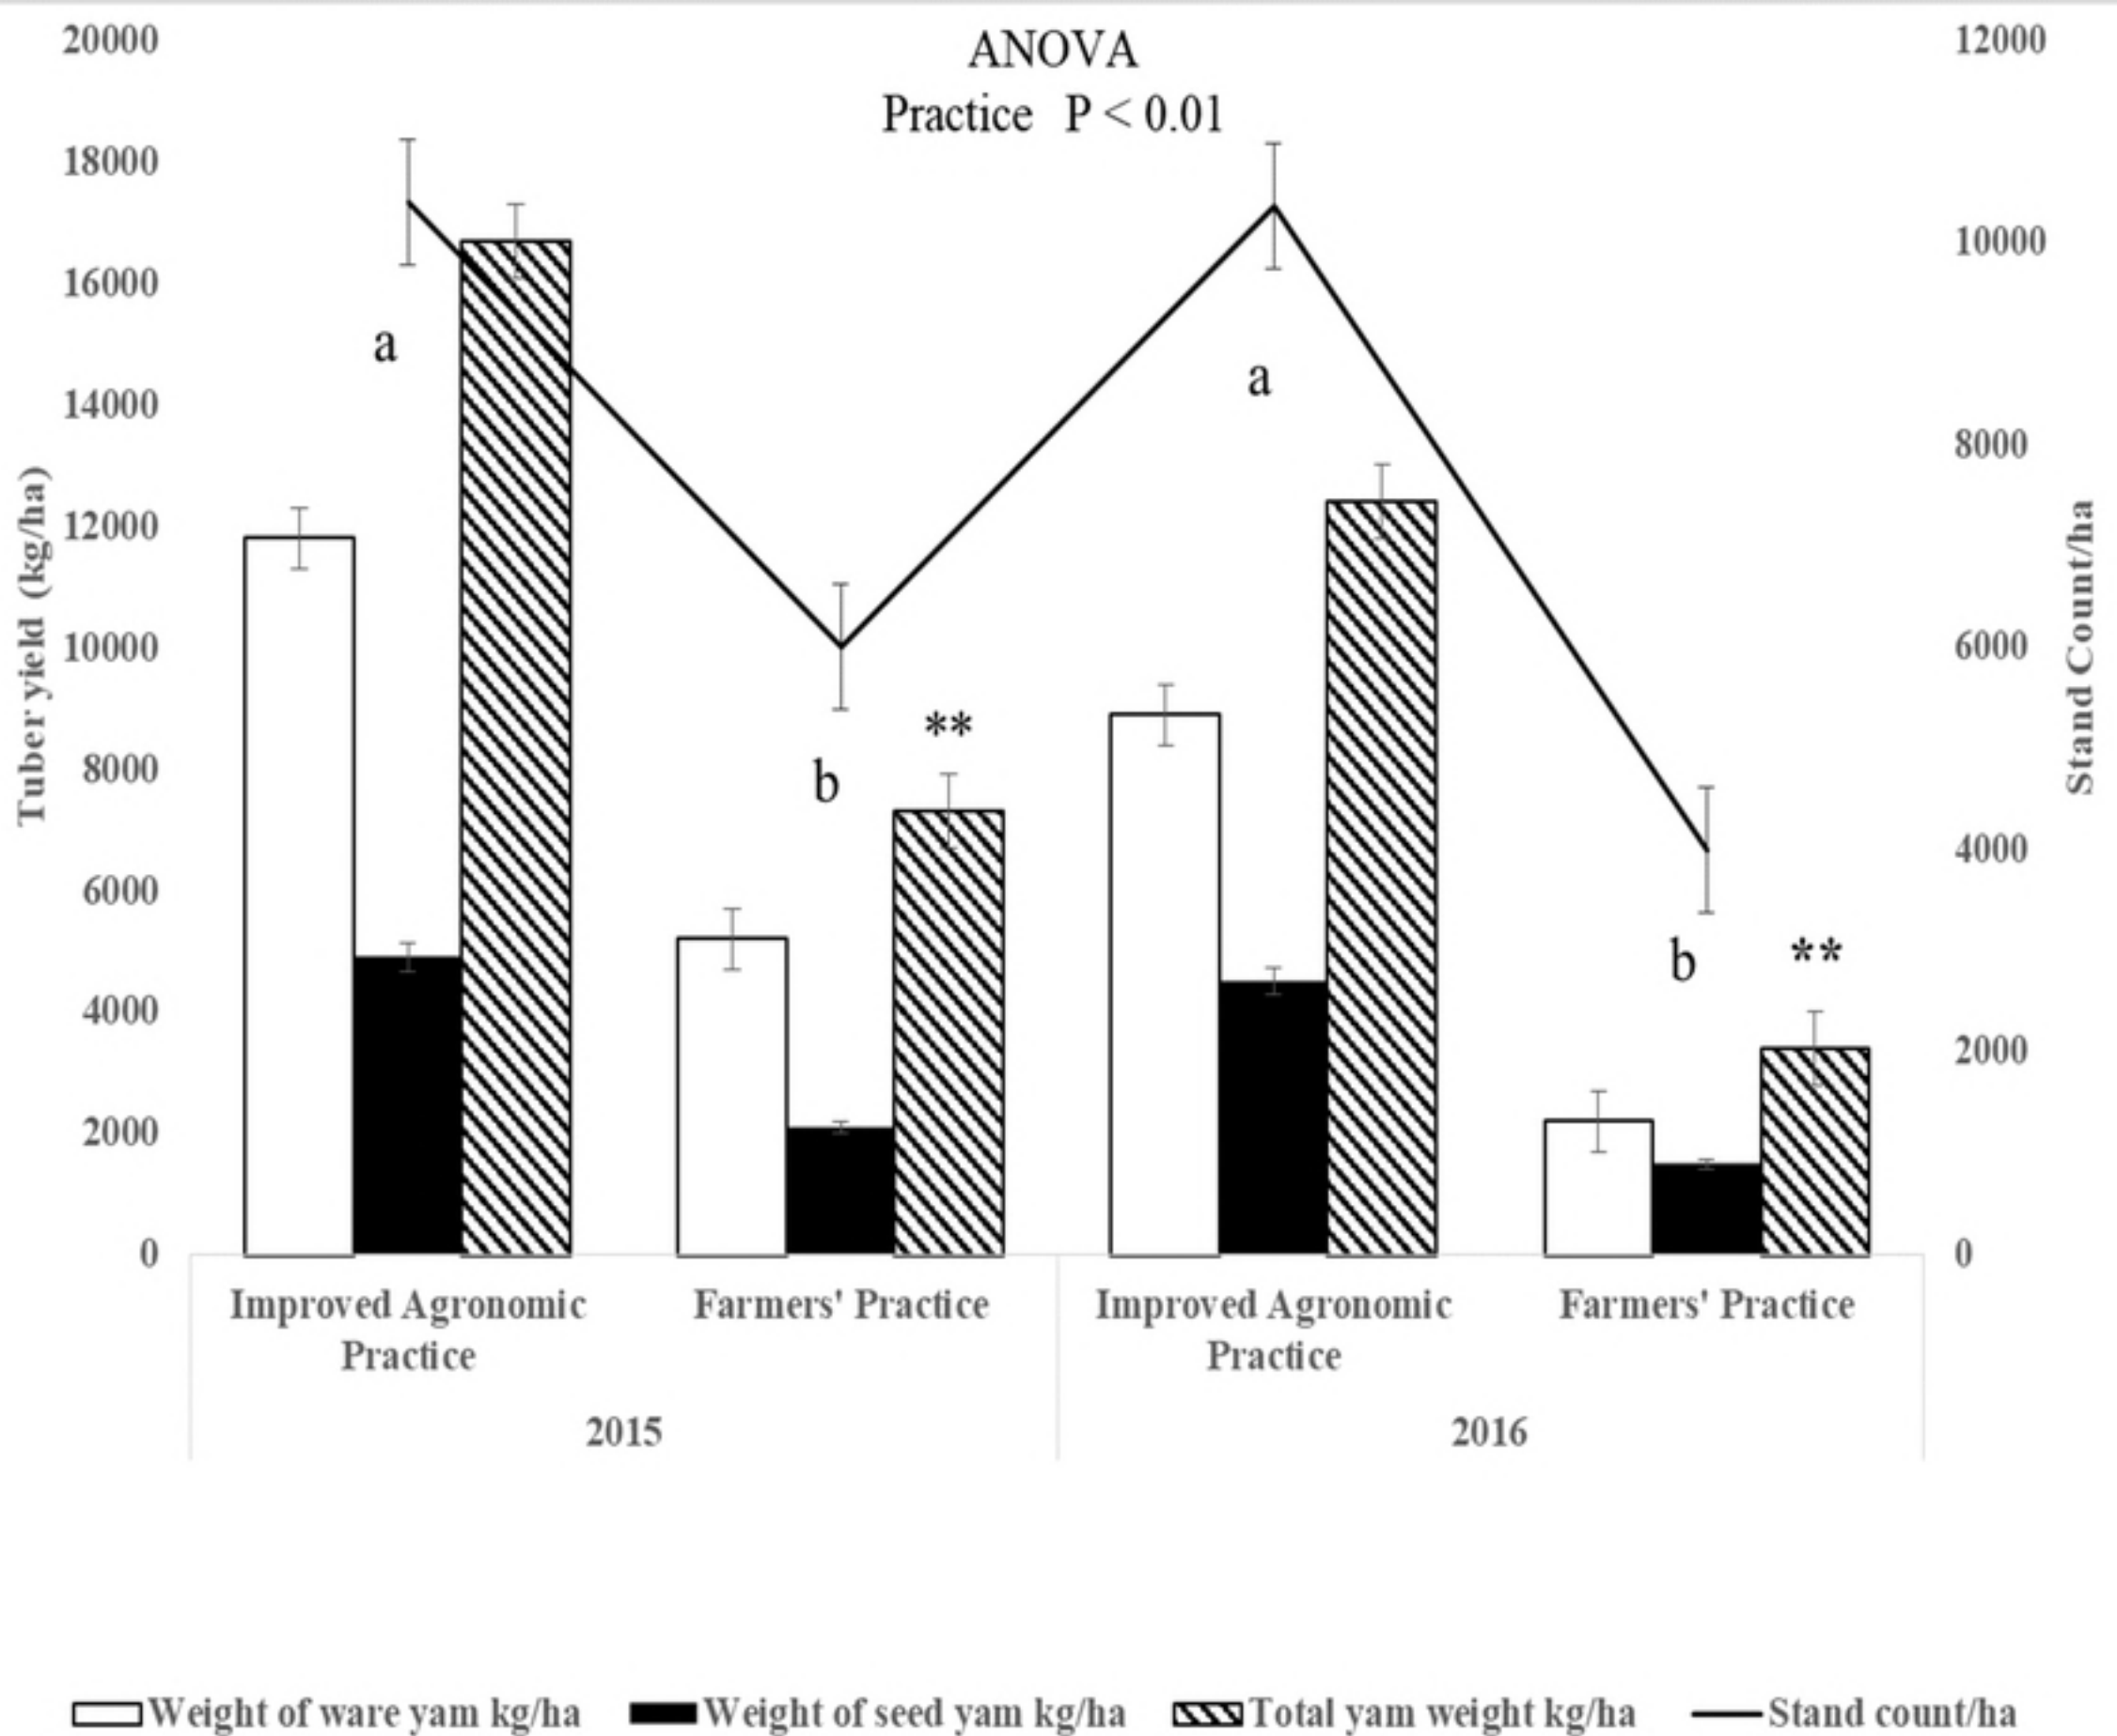

Figure 3

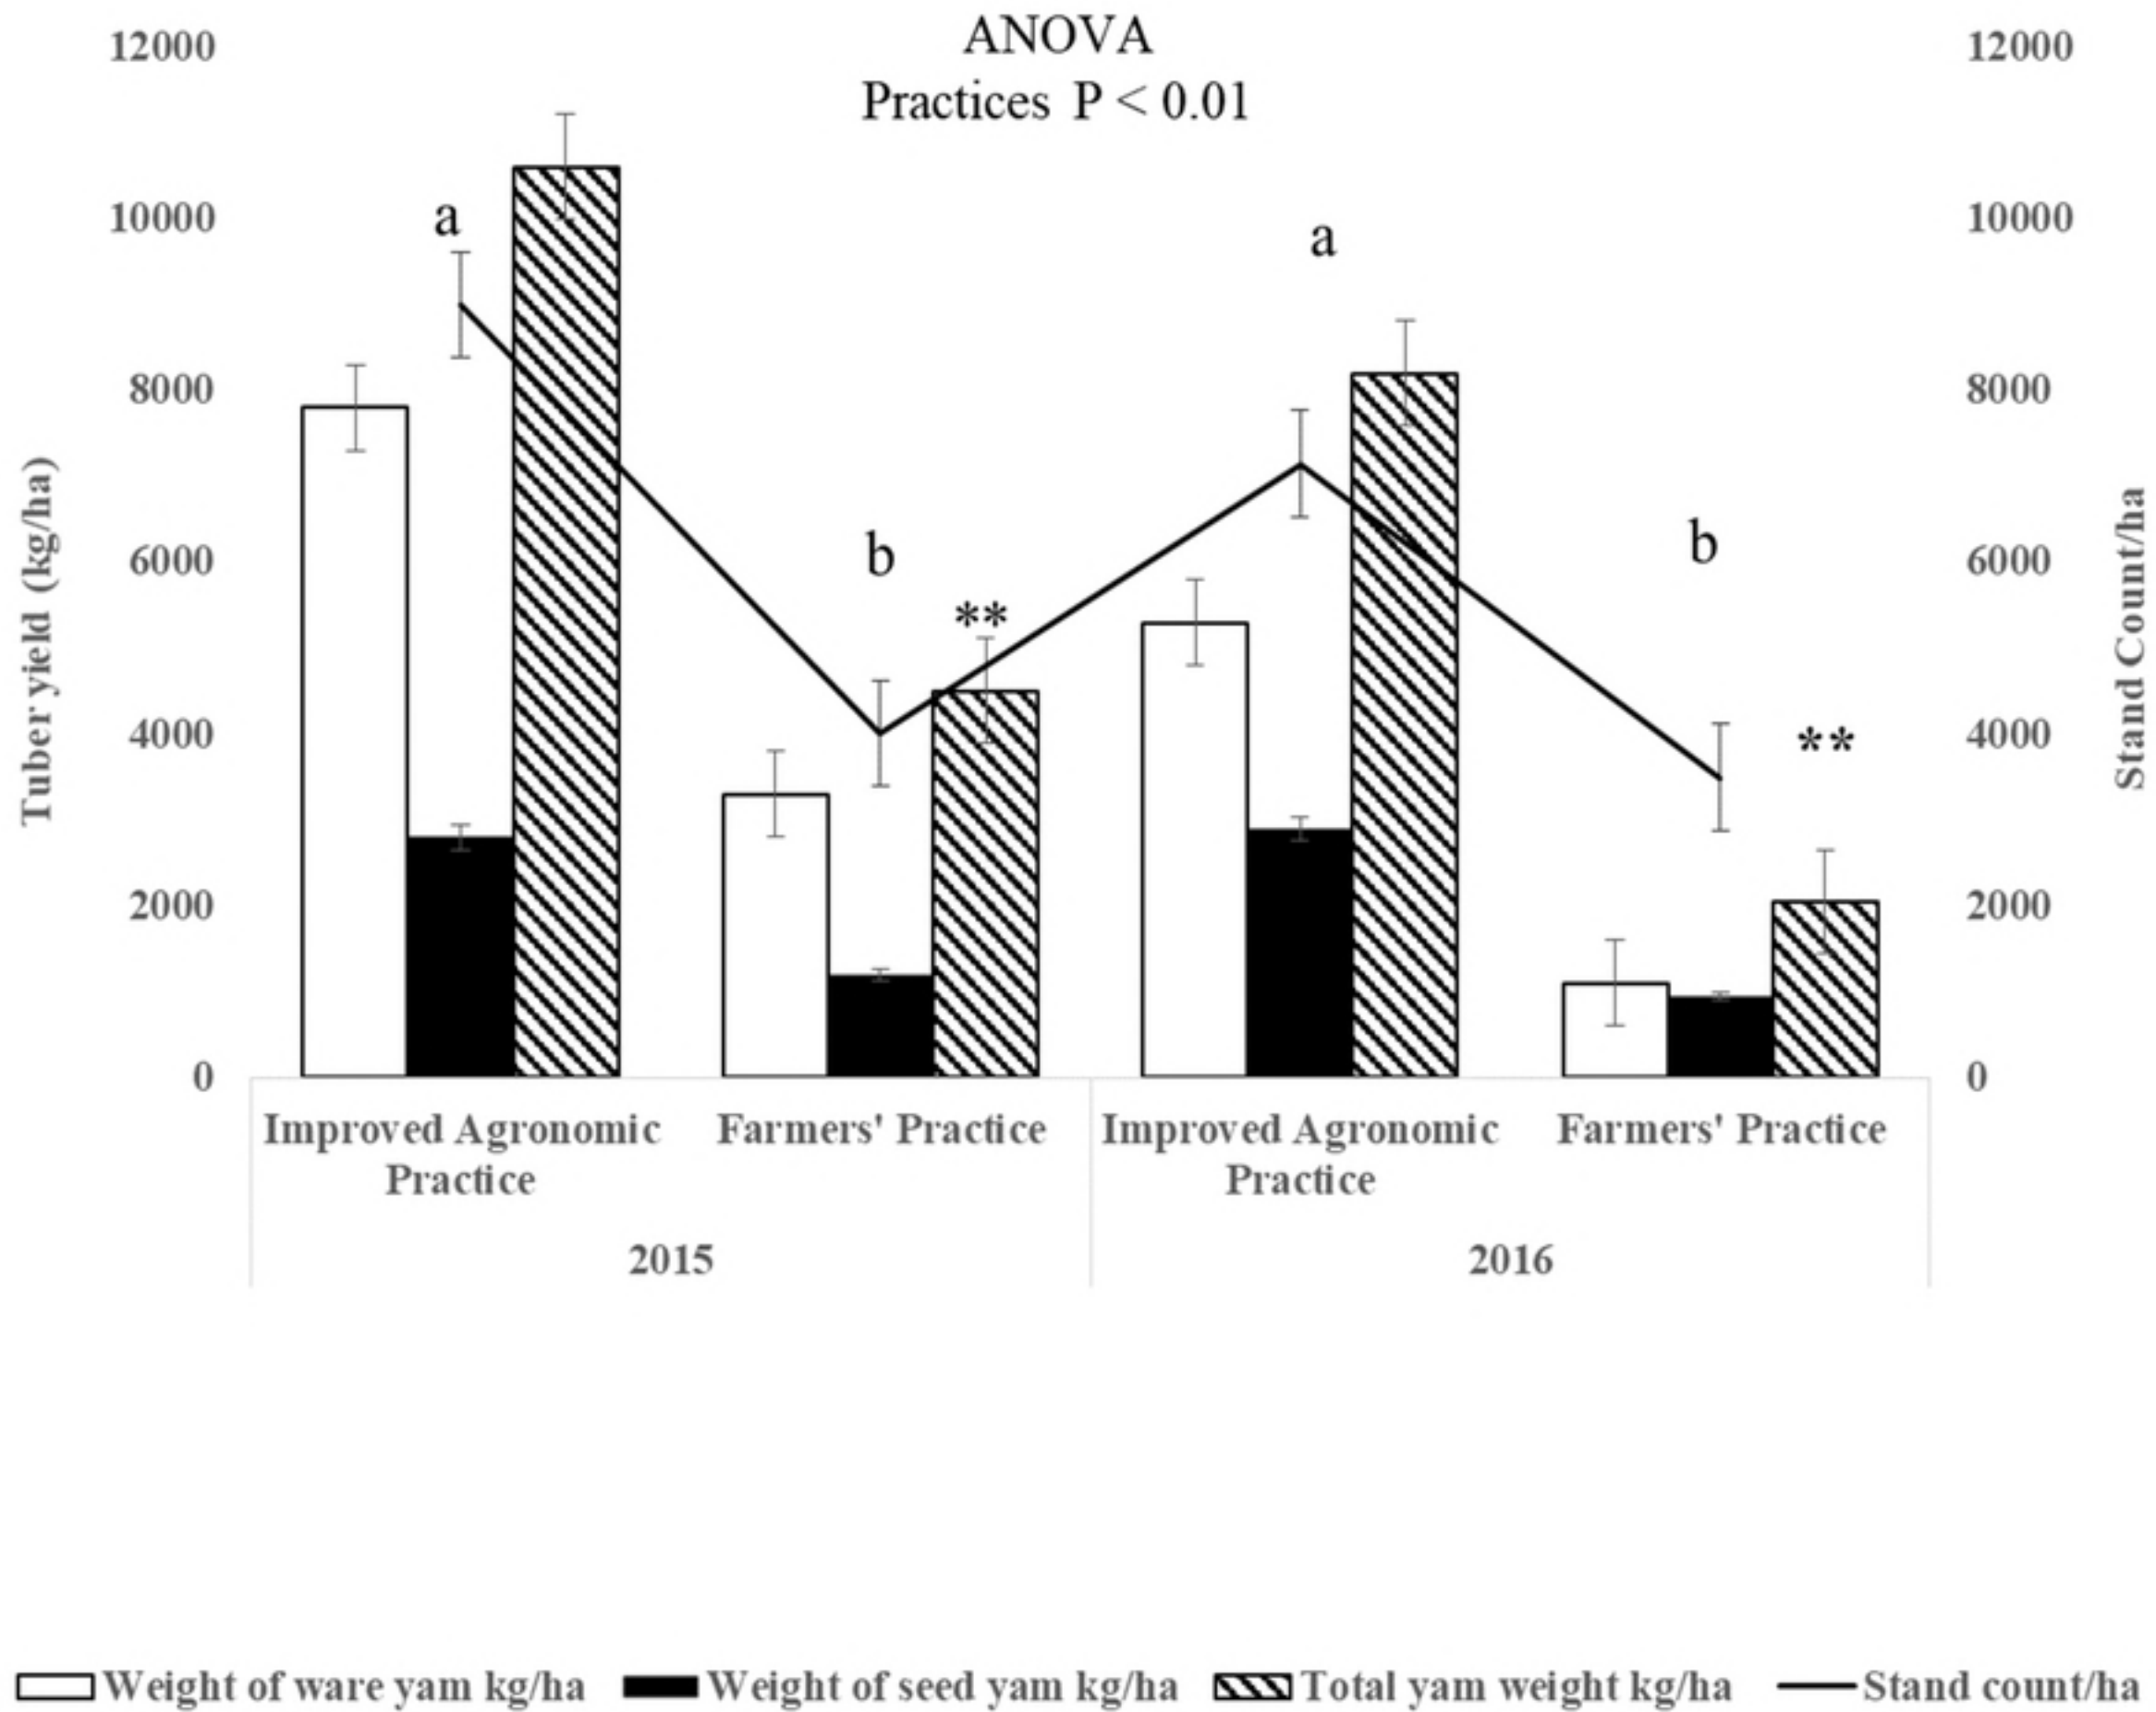

Figure 4

**Percentage (%) difference between the improved technology and farmers' practice**

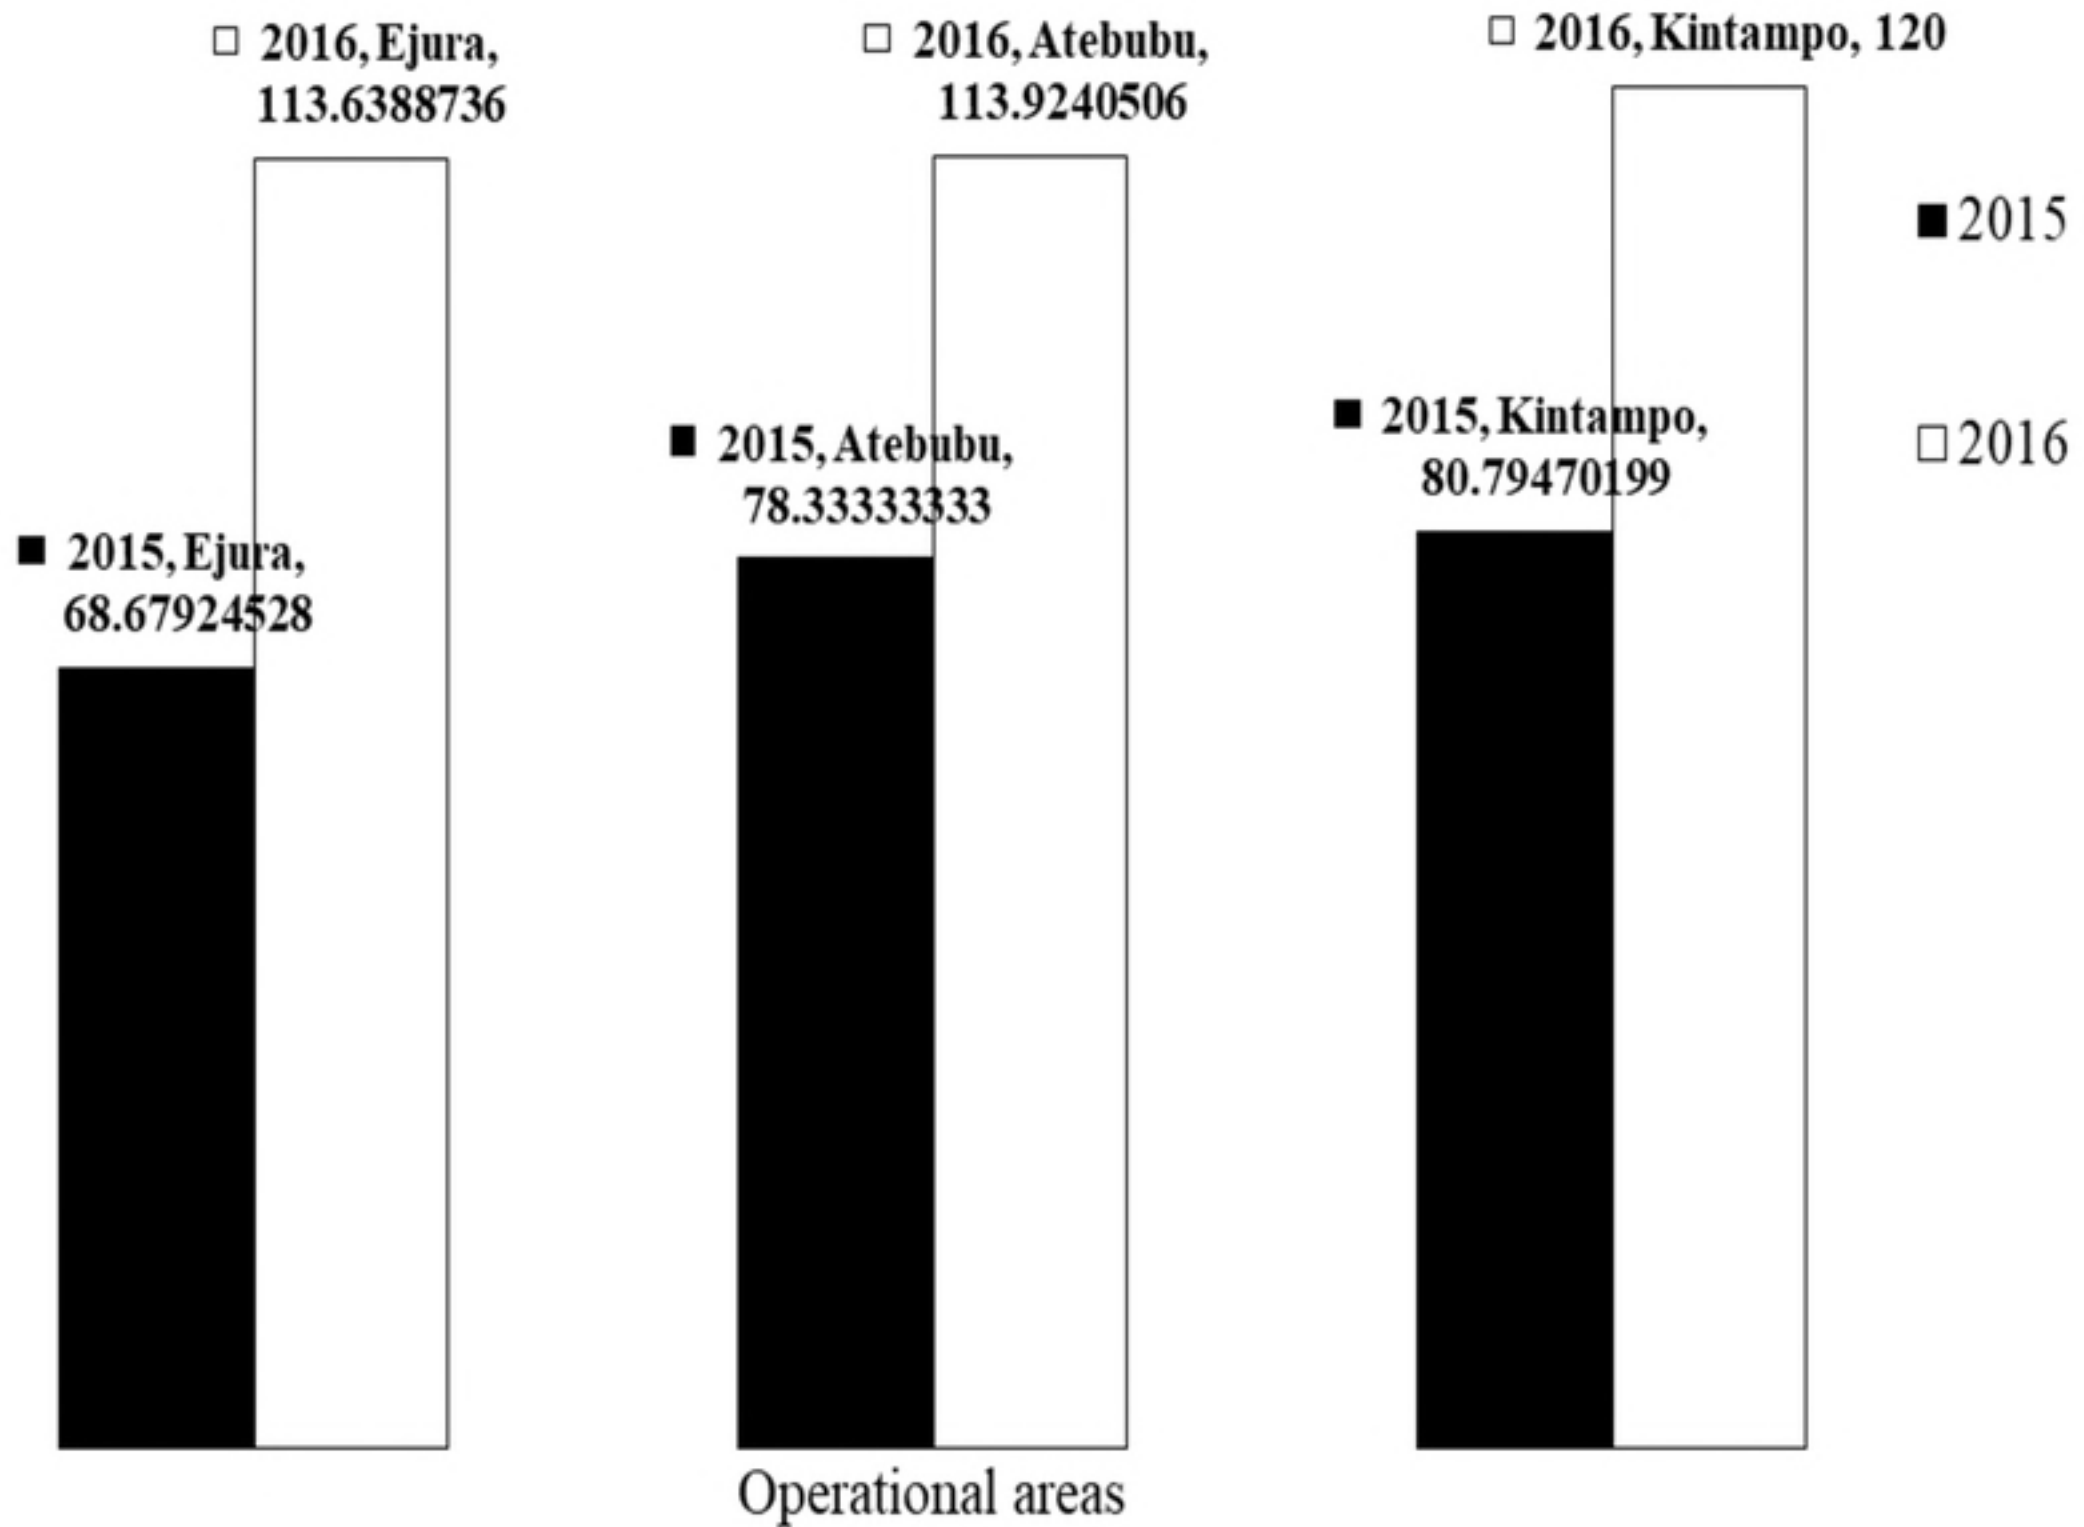

Figure 5
